# Supplementary material
Source: MDPI journal article supplement (https://www.mdpi.com/2073-4441/15/12/2223)
Supplement: s1 [file s1]

# **Supporting Information**

## **Spatial distribution, migration and ecological risk of heavy metals of sediments and soils surrounding sulfide mines - A case study of the Dabaoshan mine of Guangdong, China**

Weikang Sheng<sup>1</sup>, Qingye Hou<sup>1,\*</sup>, Zhongfang Yang<sup>1</sup>, Tao Yu<sup>2</sup>

<sup>1</sup> School of Earth Science and Resources, China University of Geosciences, Beijing,  
100083, China

<sup>2</sup> School of Science, China University of Geosciences, Beijing, 100083, China

\*Corresponding author: Qingye Hou; E-mail address: qingyehou@cugb.edu.cn.

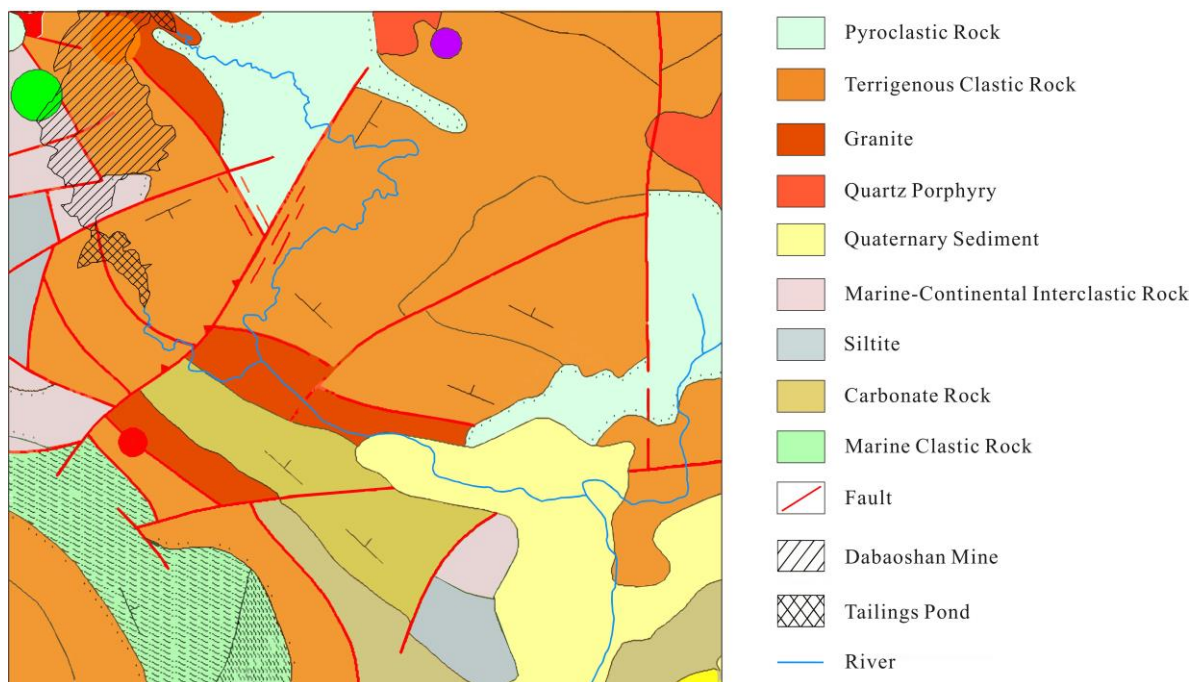

**Figure S1 The geological map of study area (modified by National Geological Archive)**

### The quality control analysis of data

The national standard materials (GBW) were used for controlling the accuracy and precision of the analytical methods. Accuracy and Precision are shown by calculating the logarithm deviation ( $\overline{\Delta \lg \bar{C}}$ ) and relative standard deviation (RSD) between measurements and standard values and, respectively, and are calculated using followed formula:

$$\overline{\Delta \lg \bar{C}} (GBW) = |\lg \bar{C}_i - \lg C_s|$$
$$RSD (\%) = 100\% \times \sqrt{\sum_{i=1}^n (C_i - C_s)^2 / (n - 1) / C_s}$$

Where  $C_i$  is the single measure value for each GBW standard material,  $\bar{C}_i$  is the average of 12 measured values for each GBW standard material,  $C_s$  is the standard value of GBW standard materials and n is the number of measurements for each GBW standard material.

The accuracy and precision of tests for elements concentration in soil, sediments and rice grains all meet the requirements of Specification of Multi-Purpose Regional Geochemical Survey (DZ/T 0258-2014).

**Table S1. The Risk Screening Values (RSVs) and Risk Intervention Values (RIVs) for Cd, Pb and Zn in “Soil Environment Quality: Risk Control Standard for Soil Contamination of Agricultural Land” (GB15618-2018)**

|             | Cd  | Pb  | Zn  |
|-------------|-----|-----|-----|
| RSV (mg/kg) | 0.4 | 100 | 200 |
| RIV (mg/kg) | 2   | 500 | -   |

**Table S2. The Threshold Effect Level (TEL) and Probable Effect Level (PEL) of Cd, Pb, and Zn in Sediment Quality Guidelines (SQGs)**

|             | Cd   | Pb   | Zn  |
|-------------|------|------|-----|
| TEL (mg/kg) | 0.68 | 30.2 | 124 |
| PEL (mg/kg) | 4.21 | 112  | 271 |

**Table S3. The concentrations of Cd, Pb, Zn, oxides and physicochemical properties of natural forest soil sampled in study area**

|       | Al <sub>2</sub> O <sub>3</sub> | CaO  | K <sub>2</sub> O | MgO  | Mn  | Na <sub>2</sub> O | SiO <sub>2</sub> | TFe <sub>2</sub> O <sub>3</sub> | Cd   | Pb     | Zn    | CEC  | pH   | SOM  | CaCl <sub>2</sub> -extracted<br>Cd |
|-------|--------------------------------|------|------------------|------|-----|-------------------|------------------|---------------------------------|------|--------|-------|------|------|------|------------------------------------|
| NFS01 | 11.22                          | 0.23 | 1.92             | 0.52 | 386 | 0.11              | 75.04            | 4.46                            | 1.02 | 57.6   | 161.3 | 6.51 | 5.67 | 0.81 | 0.13                               |
| NFS02 | 10.46                          | 0.68 | 2.20             | 0.85 | 951 | 0.13              | 65.87            | 14.55                           | 1.62 | 356.4  | 522.6 | 3.72 | 4.18 | 0.51 | 0.02                               |
| NFS03 | 13.12                          | 0.25 | 2.87             | 0.92 | 444 | 0.14              | 63.66            | 14.18                           | 0.66 | 1118.1 | 446.6 | 4.78 | 4.22 | 0.47 | 0.04                               |
| NFS04 | 8.08                           | 0.19 | 1.33             | 0.35 | 546 | 0.13              | 82.04            | 4.07                            | 0.36 | 46.1   | 73.9  | 3.99 | 5.81 | 0.51 | 0.05                               |
| NFS05 | 12.65                          | 0.25 | 2.35             | 0.63 | 699 | 0.19              | 70.55            | 6.44                            | 0.51 | 125.6  | 166.3 | 4.38 | 5.24 | 0.53 | 0.06                               |
| NFS06 | 8.81                           | 0.26 | 2.88             | 0.51 | 383 | 0.26              | 81.15            | 3.43                            | 0.22 | 55.0   | 80.7  | 4.25 | 6.09 | 0.51 | 0.03                               |

Cd, Pb, Zn and Mn: mg/kg; CEC: cmol/kg; others: %

**Table S4. The concentrations of Rice grain and concentrations of Cd, Pb, Zn, oxides and physicochemical properties of corresponding agricultural soils sampled in study area**

|       | Agriculture Soils                                |      |                  |      |      |                   |                                 |      |       |       |       |      |      |                                 | Rice Grain |      |      |
|-------|--------------------------------------------------|------|------------------|------|------|-------------------|---------------------------------|------|-------|-------|-------|------|------|---------------------------------|------------|------|------|
|       | Al <sub>2</sub> O <sub>3</sub> /SiO <sub>2</sub> | CaO  | K <sub>2</sub> O | MgO  | Mn   | Na <sub>2</sub> O | TFe <sub>2</sub> O <sub>3</sub> | Cd   | Pb    | Zn    | CEC   | pH   | SOM  | CaCl <sub>2</sub> -extracted Cd | Cd         | Pb   | Zn   |
| FLS01 | 0.23                                             | 1.41 | 1.64             | 0.81 | 5069 | 0.12              | 8.83                            | 0.56 | 38.7  | 259.0 | 7.84  | 6.60 | 0.28 | 0.01                            | 0.70       | 0.06 | 18.2 |
| FLS02 | 0.13                                             | 0.27 | 2.65             | 0.79 | 463  | 0.19              | 6.69                            | 1.08 | 153.4 | 333.3 | 8.90  | 5.72 | 1.26 | 0.11                            | 0.70       | 0.06 | 18.1 |
| FLS03 | 0.16                                             | 0.80 | 2.17             | 0.79 | 2593 | 0.15              | 7.62                            | 0.82 | 99.4  | 293.2 | 8.28  | 6.12 | 0.80 | 0.06                            | 0.71       | 0.06 | 17.7 |
| FLS04 | 0.13                                             | 0.48 | 2.34             | 0.69 | 1317 | 0.15              | 6.63                            | 0.63 | 126.7 | 238.2 | 6.65  | 5.79 | 0.97 | 0.08                            | 0.52       | 0.06 | 23.9 |
| FLS05 | 0.13                                             | 0.19 | 2.89             | 0.69 | 203  | 0.16              | 7.12                            | 0.66 | 194.4 | 251.8 | 5.18  | 5.53 | 1.17 | 0.10                            | 0.63       | 0.07 | 21.2 |
| FLS06 | 0.11                                             | 0.22 | 2.64             | 0.69 | 178  | 0.15              | 6.03                            | 0.44 | 157.8 | 196.9 | 5.32  | 5.74 | 1.17 | 0.06                            | 0.65       | 0.08 | 20.0 |
| FLS07 | 0.07                                             | 0.15 | 1.70             | 0.40 | 103  | 0.12              | 2.92                            | 0.20 | 57.1  | 80.5  | 5.04  | 5.46 | 0.94 | 0.14                            | 0.78       | 0.12 | 22.4 |
| FLS08 | 0.07                                             | 0.14 | 1.66             | 0.39 | 100  | 0.12              | 2.83                            | 0.19 | 53.9  | 75.8  | 4.96  | 5.41 | 0.92 | 0.14                            | 0.01       | 0.02 | 15.6 |
| FLS09 | 0.07                                             | 0.14 | 1.31             | 0.37 | 149  | 0.12              | 2.58                            | 0.18 | 60.7  | 90.4  | 5.85  | 5.20 | 1.20 | 0.19                            | 1.37       | 0.17 | 18.2 |
| FLS10 | 0.08                                             | 0.17 | 1.95             | 0.49 | 149  | 0.14              | 6.03                            | 0.35 | 146.8 | 150.2 | 5.45  | 4.87 | 1.15 | 0.16                            | 2.12       | 0.27 | 17.8 |
| FLS11 | 0.09                                             | 0.23 | 1.92             | 0.51 | 182  | 0.15              | 4.83                            | 0.41 | 117.6 | 164.8 | 6.58  | 5.00 | 1.14 | 0.13                            | 2.69       | 0.39 | 16.9 |
| FLS12 | 0.09                                             | 0.30 | 1.98             | 0.55 | 223  | 0.17              | 4.61                            | 0.54 | 120.5 | 210.1 | 7.63  | 4.95 | 1.12 | 0.09                            | 1.31       | 0.02 | 19.9 |
| FLS13 | 0.10                                             | 0.37 | 1.99             | 0.58 | 257  | 0.19              | 4.82                            | 0.64 | 146.3 | 259.5 | 8.50  | 4.66 | 1.05 | 0.04                            | 1.59       | 0.12 | 19.1 |
| FLS14 | 0.10                                             | 0.52 | 2.17             | 0.77 | 284  | 0.20              | 4.47                            | 0.95 | 117.2 | 300.0 | 7.71  | 5.13 | 1.15 | 0.04                            | 1.46       | 0.13 | 18.9 |
| FLS15 | 0.11                                             | 0.23 | 2.12             | 0.51 | 197  | 0.20              | 4.19                            | 0.32 | 85.5  | 174.3 | 7.71  | 5.68 | 1.07 | 0.09                            | 1.33       | 0.13 | 18.9 |
| FLS16 | 0.11                                             | 0.28 | 2.20             | 0.54 | 271  | 0.19              | 3.64                            | 1.09 | 97.0  | 270.0 | 9.30  | 5.13 | 1.62 | 0.19                            | 1.08       | 0.11 | 18.9 |
| FLS17 | 0.11                                             | 0.38 | 2.30             | 0.55 | 267  | 0.21              | 4.57                            | 0.69 | 109.3 | 214.4 | 10.10 | 5.70 | 1.39 | 0.10                            | 0.76       | 0.07 | 18.6 |
| FLS18 | 0.12                                             | 0.27 | 2.31             | 0.44 | 328  | 0.33              | 3.57                            | 0.24 | 51.7  | 82.6  | 7.18  | 5.79 | 1.64 | 0.09                            | 0.72       | 0.07 | 18.5 |

Cd, Pb, Zn and Mn: mg/kg; CEC: cmol/kg; others: %

**Table S5. The concentrations of Cd, Pb, Zn, oxides and physicochemical properties of sediments sampled in study area**

|       | Al <sub>2</sub> O <sub>3</sub> | CaO   | K <sub>2</sub> O | MgO   | Mn      | Na <sub>2</sub> O | SiO <sub>2</sub> | TFe <sub>2</sub> O <sub>3</sub> | Cd    | Pb    | Zn     | CEC   | pH   | SOM  | CaCl <sub>2</sub> -extracted Cd |
|-------|--------------------------------|-------|------------------|-------|---------|-------------------|------------------|---------------------------------|-------|-------|--------|-------|------|------|---------------------------------|
| SST01 | 5.91                           | 16.32 | 0.99             | 10.64 | 1228.5  | 0.15              | 23.44            | 4.38                            | 5.29  | 547.5 | 1238.5 | 22.59 | 9.10 | 3.41 | 0.004                           |
| SST02 | 9.47                           | 0.61  | 2.28             | 0.71  | 11104.2 | 0.14              | 66.57            | 13.49                           | 2.65  | 200.5 | 573.1  | 9.57  | 7.50 | 1.22 | 0.010                           |
| SST03 | 13.31                          | 4.19  | 2.21             | 2.96  | 2384.5  | 0.14              | 45.10            | 17.28                           | 10.78 | 868.7 | 2597.0 | 7.44  | 8.34 | 1.33 | 0.004                           |
| SST04 | 8.73                           | 7.58  | 1.76             | 6.48  | 2468.2  | 0.15              | 46.19            | 10.03                           | 13.46 | 334.5 | 2780.5 | 3.45  | 9.09 | 0.79 | 0.003                           |
| SST05 | 6.60                           | 10.36 | 1.16             | 3.86  | 7214.0  | 0.12              | 52.14            | 9.16                            | 20.22 | 584.9 | 2497.9 | 1.33  | 9.12 | 0.60 | 0.005                           |
| SST06 | 13.34                          | 1.59  | 3.10             | 0.82  | 2035.8  | 0.26              | 65.45            | 7.72                            | 4.28  | 196.3 | 644.7  | 5.58  | 7.94 | 0.49 | 0.015                           |
| SST07 | 11.12                          | 8.24  | 2.07             | 3.78  | 6416.1  | 0.15              | 45.16            | 9.85                            | 15.46 | 452.7 | 3276.1 | 6.64  | 8.22 | 0.77 | 0.004                           |

Cd, Pb, Zn and Mn: mg/kg; CEC: cmol/kg; others: %

**Table S6. Pearson correlation coefficients between the bioconcentration factor of Cd (BCF<sub>Cd</sub>) and soil properties in agricultural soils from the study area**

|                   | S     | Na <sub>2</sub> O | MgO     | K <sub>2</sub> O | CaO    | TFe <sub>2</sub> O <sub>3</sub> | Corg  | pH    | Al <sub>2</sub> O <sub>3</sub> /SiO <sub>2</sub> | Mn     |
|-------------------|-------|-------------------|---------|------------------|--------|---------------------------------|-------|-------|--------------------------------------------------|--------|
| BCF <sub>Cd</sub> | -0.26 | -0.50             | -0.74** | -0.62*           | -0.60* | -0.59*                          | -0.05 | -0.38 | -0.79**                                          | -0.53* |

\*: Significant at p<0.05

\*\*: Significant at p<0.01
